# Supplementary material
Source: PubMed Central journal article supplement (PMC4724016)
Supplement: ijcem0008-21981-f2.pdf [file ijcem0008-21981-f2.pdf]

## Characterisation of molecular subtypes in EC

**Table S1.** Immunohistochemistry staining details

| Antibody | Clone      | Manufacturer   | Dilution     | Antigen retrieval                 | Incubation               | Kit       |
|----------|------------|----------------|--------------|-----------------------------------|--------------------------|-----------|
| ESR1     | SP1        | Roche          | ready to use | Benchmark's protocol              |                          | ultraView |
| PGR      | 1E2        | Roche          | ready to use | Benchmark's protocol              |                          | ultraView |
| ERBB1    | EGFR113    | Novocastra     | 1:20         | pH=9 (DAKO S3267), heat induced   | 90 min, room temperature | Novolink  |
| HER2     | 4B5        | Roche          | ready to use | Benchmark's protocol              |                          | ultraView |
| ERBB3    | DAK-H3-IC  | DAKO           | 1:50         | pH=9 (DAKO S3267), heat induced   | 90 min, room temperature | Novolink  |
| ERBB4    | HFR1       | Abcam          | 1:50         | pH=6.1 (DAKO S1699), heat induced | 90 min, room temperature | Novolink  |
| PIK3CA   | C73F8      | Cell Signaling | 1:50         | pH=6.1 (DAKO S1699), heat induced | 90 min, room temperature | Novolink  |
| pAKT1    | D9E        | Cell Signaling | 1:20         | pH=6.1 (DAKO S1699), heat induced | 90 min, room temperature | Novolink  |
| STMN1    | EPR1574    | Abcam          | 1:400        | pH=6.1 (DAKO S1699), heat induced | 90 min, room temperature | Novolink  |
| PTEN     | 6H2.1      | DAKO           | 1:200        | pH=6.1 (DAKO S1699), heat induced | 90 min, room temperature | Novolink  |
| TP53     | BP-53-11   | Roche          | ready to use | Benchmark's protocol              |                          | ultraView |
| MLH1     | M1         | Roche          | ready to use | Benchmark's protocol              |                          | ultraView |
| MSH2     | G219-1129  | Roche          | ready to use | Benchmark's protocol              |                          | ultraView |
| MYC      | 9E11       | Novocastra     | 1:100        | pH=6.1 (DAKO S1699), heat induced | 90 min, room temperature | Novolink  |
| TOP2A    | Ki-S1      | DAKO           | 1:200        | pH=6.1 (DAKO S1699), heat induced | 90 min, room temperature | Novolink  |
| CDKN2A   | JC8        | Santa Cruz     | 1:200        | pH=6.1 (DAKO S1699), heat induced | 90 min, room temperature | Novolink  |
| RAD21    | Polyclonal | Abcam          | 1:500        | pH=6.1 (DAKO S1699), heat induced | 90 min, room temperature | Novolink  |
| RUNX1    | DW71       | Santa Cruz     | 1:50         | pH=6.1 (DAKO S1699), heat induced | 90 min, room temperature | Novolink  |

**Table S2.** Details of immunohistochemical evaluation

| Evaluated protein | Staining localisation | Staining intensity            | % of stained cells |
|-------------------|-----------------------|-------------------------------|--------------------|
| ER                | nucleus               | Allred score*                 |                    |
| PR                | nucleus               | Allred score                  |                    |
| HER2              | membrane              | HercepTest**                  |                    |
| ERBB1             | membrane              | HercepTest***                 |                    |
| ERBB3             | cytoplasm             | assessed                      | not assessed****   |
| ERBB4             | cytoplasm             | assessed                      | not assessed       |
| PIK3CA            | cytoplasm             | assessed                      | not assessed       |
| pAKT1             | cytoplasm, nucleus    | assessed (sum of intensities) | not assessed       |
| STMN1             | cytoplasm             | assessed                      | assessed           |
| PTEN              | cytoplasm, nucleus    | not assessed                  | assessed           |
| TP53              | nucleus               | assessed                      | assessed           |
| MLH1              | nucleus               | not assessed                  | assessed           |
| MSH2              | nucleus               | not assessed                  | assessed           |
| MYC               | cytoplasm             | assessed                      | assessed           |
| TOP2A             | nucleus               | not assessed                  | assessed           |
| CDKN2A            | cytoplasm, nucleus    | assessed                      | assessed           |
| RAD21             | nucleus               | assessed                      | not assessed       |
| RUNX1             | cytoplasm             | assessed                      | assessed           |

\*The score of staining intensity (0-3) and the % of the stained cells (divided into 5 intervals - 1: 0-1%, 2: 2-10%, 3: 11-33%, 4: 34-66%, 5: 67-100%). \*\*Score ranging from 0 to 3, with 3 defined as "A strong complete membrane staining observed in more than 10% of the tumor cells". \*\*\*modification: cut-off 1% instead of 10%. \*\*\*\*not assessed-homogenous staining or equal staining intensity in all specimen.

# Characterisation of molecular subtypes in EC

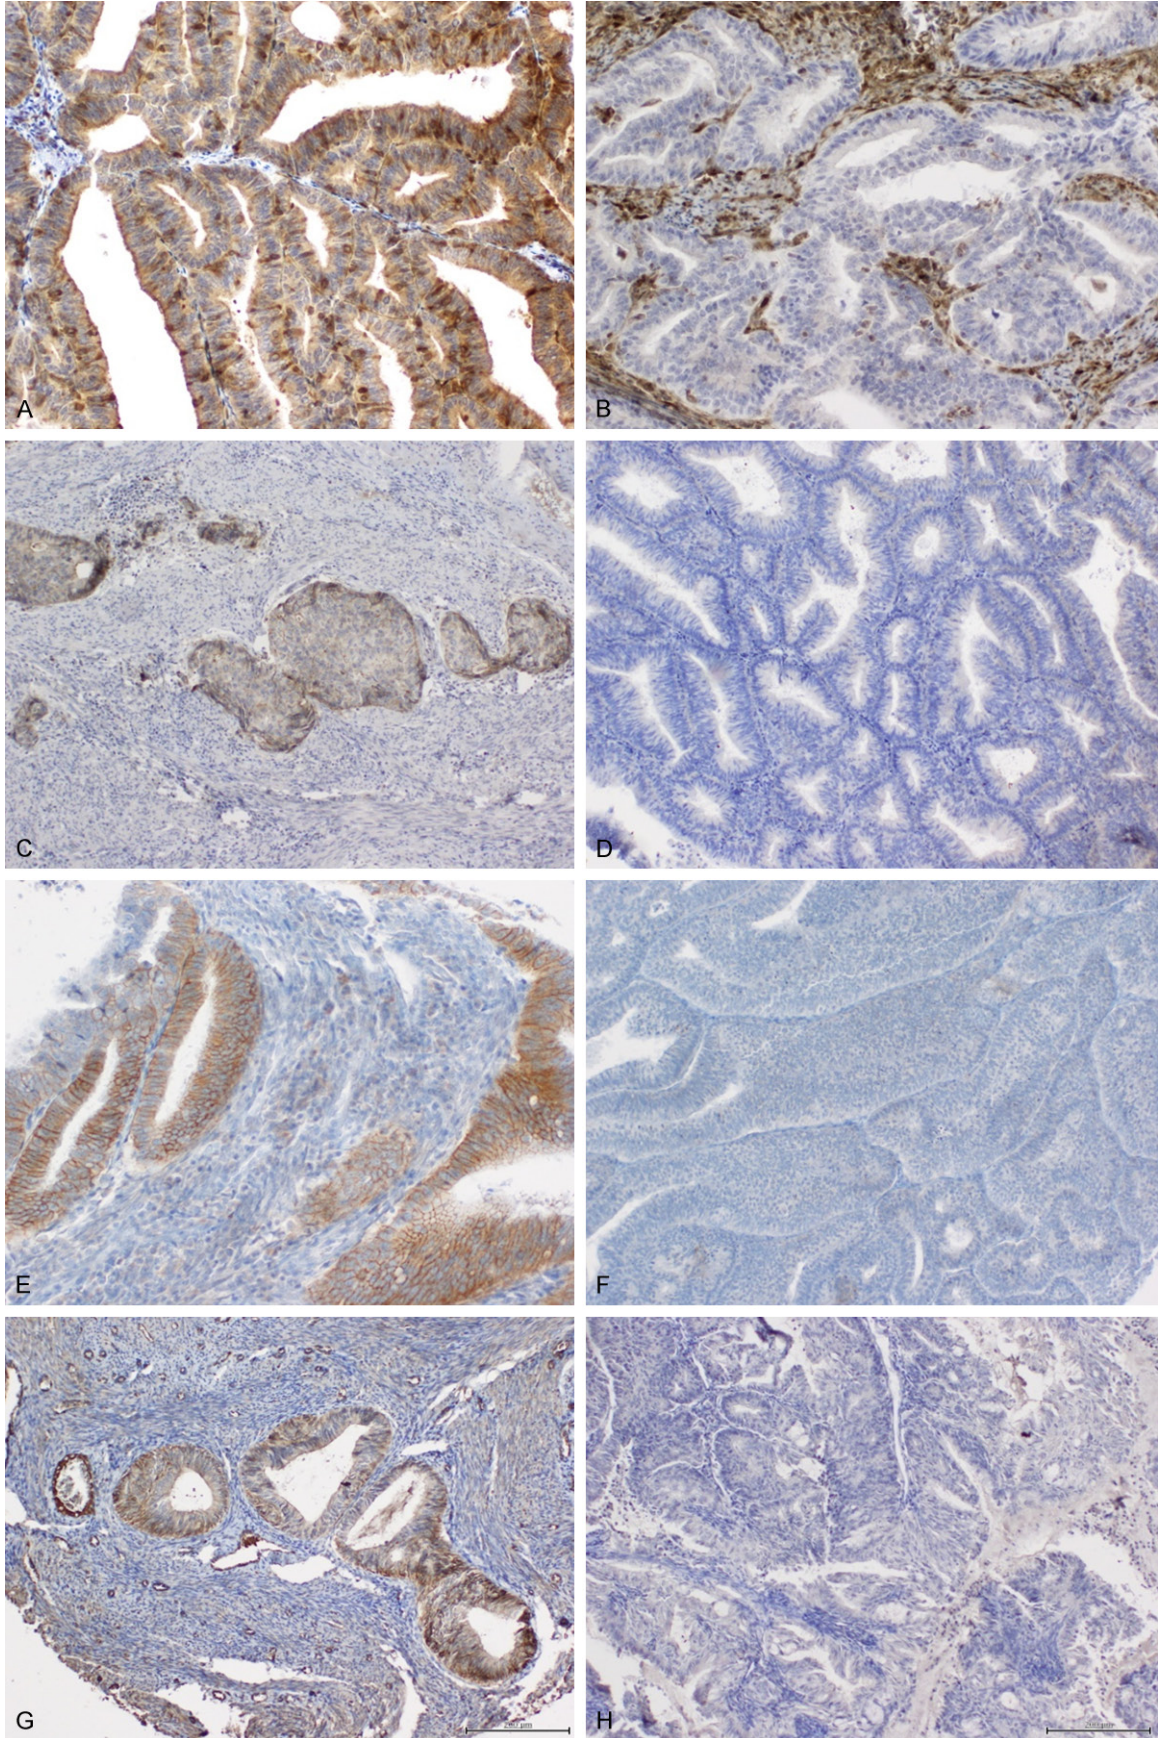

Characterisation of molecular subtypes in EC

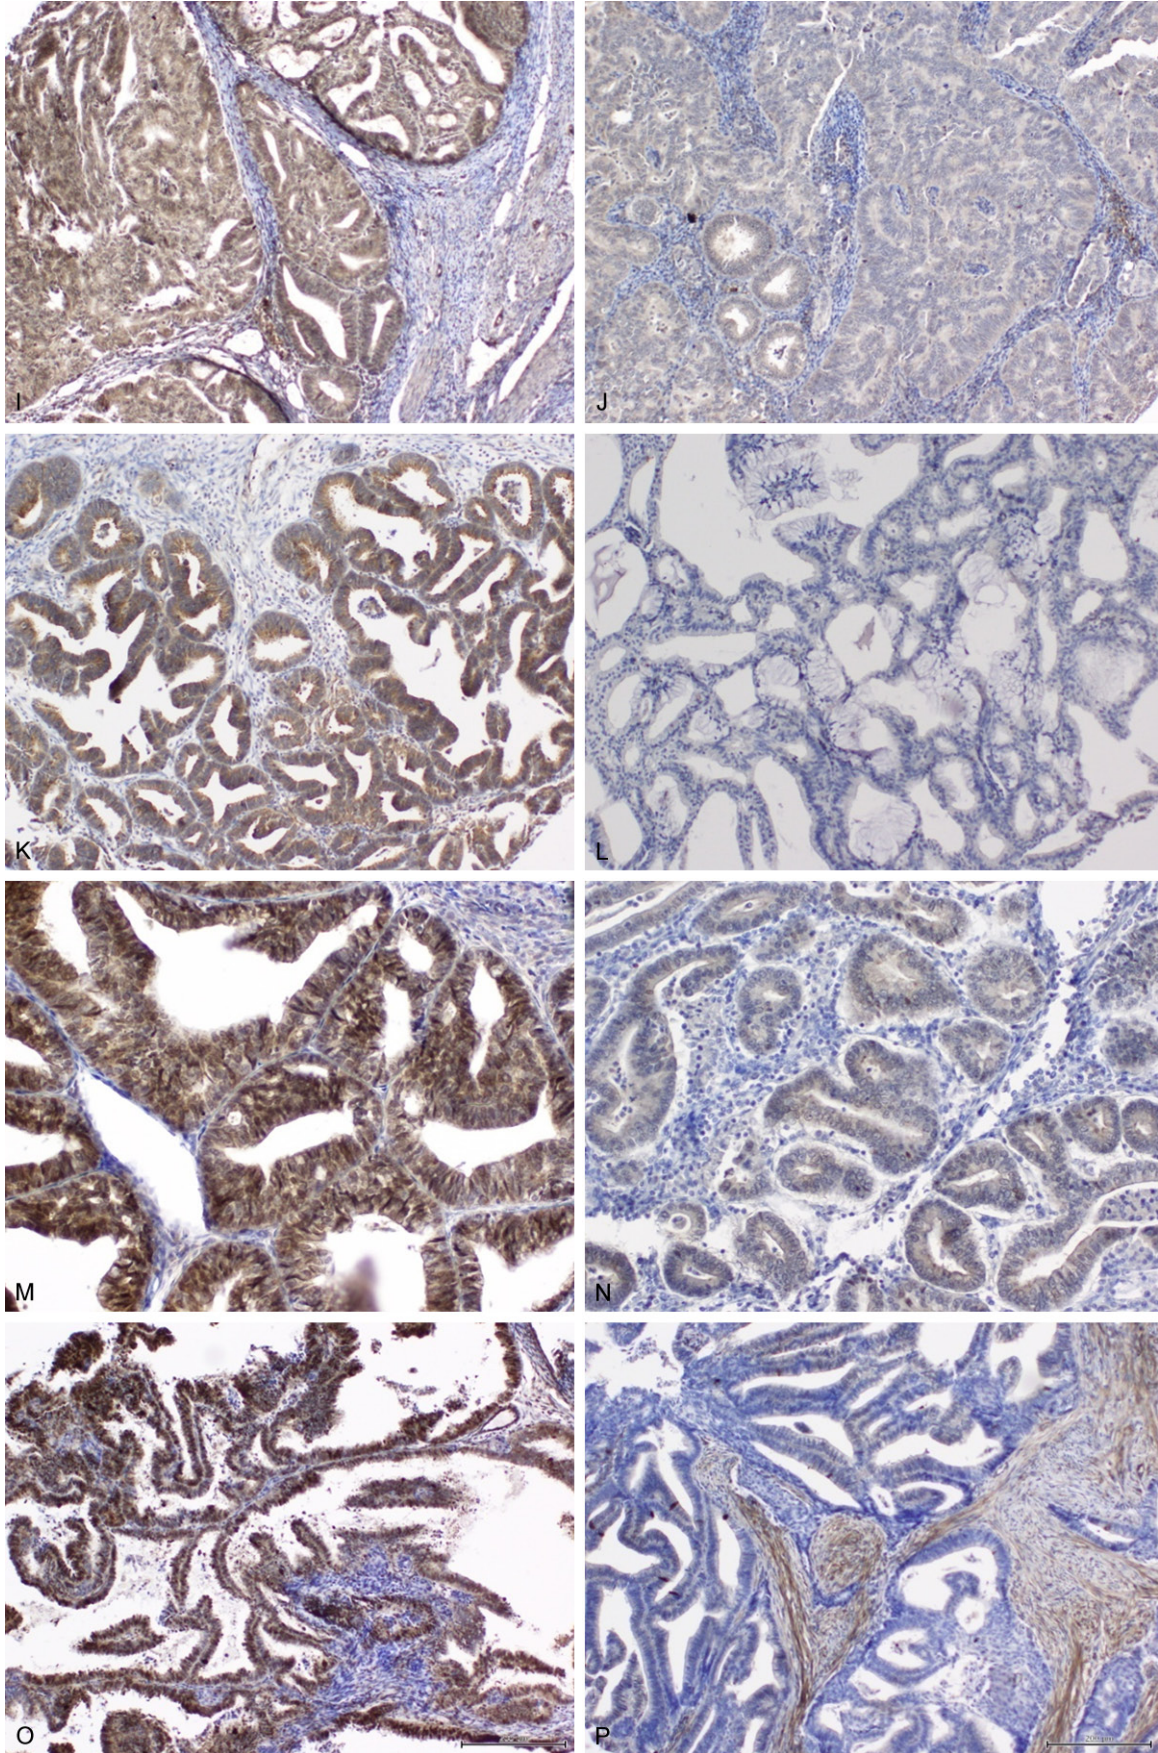

## Characterisation of molecular subtypes in EC

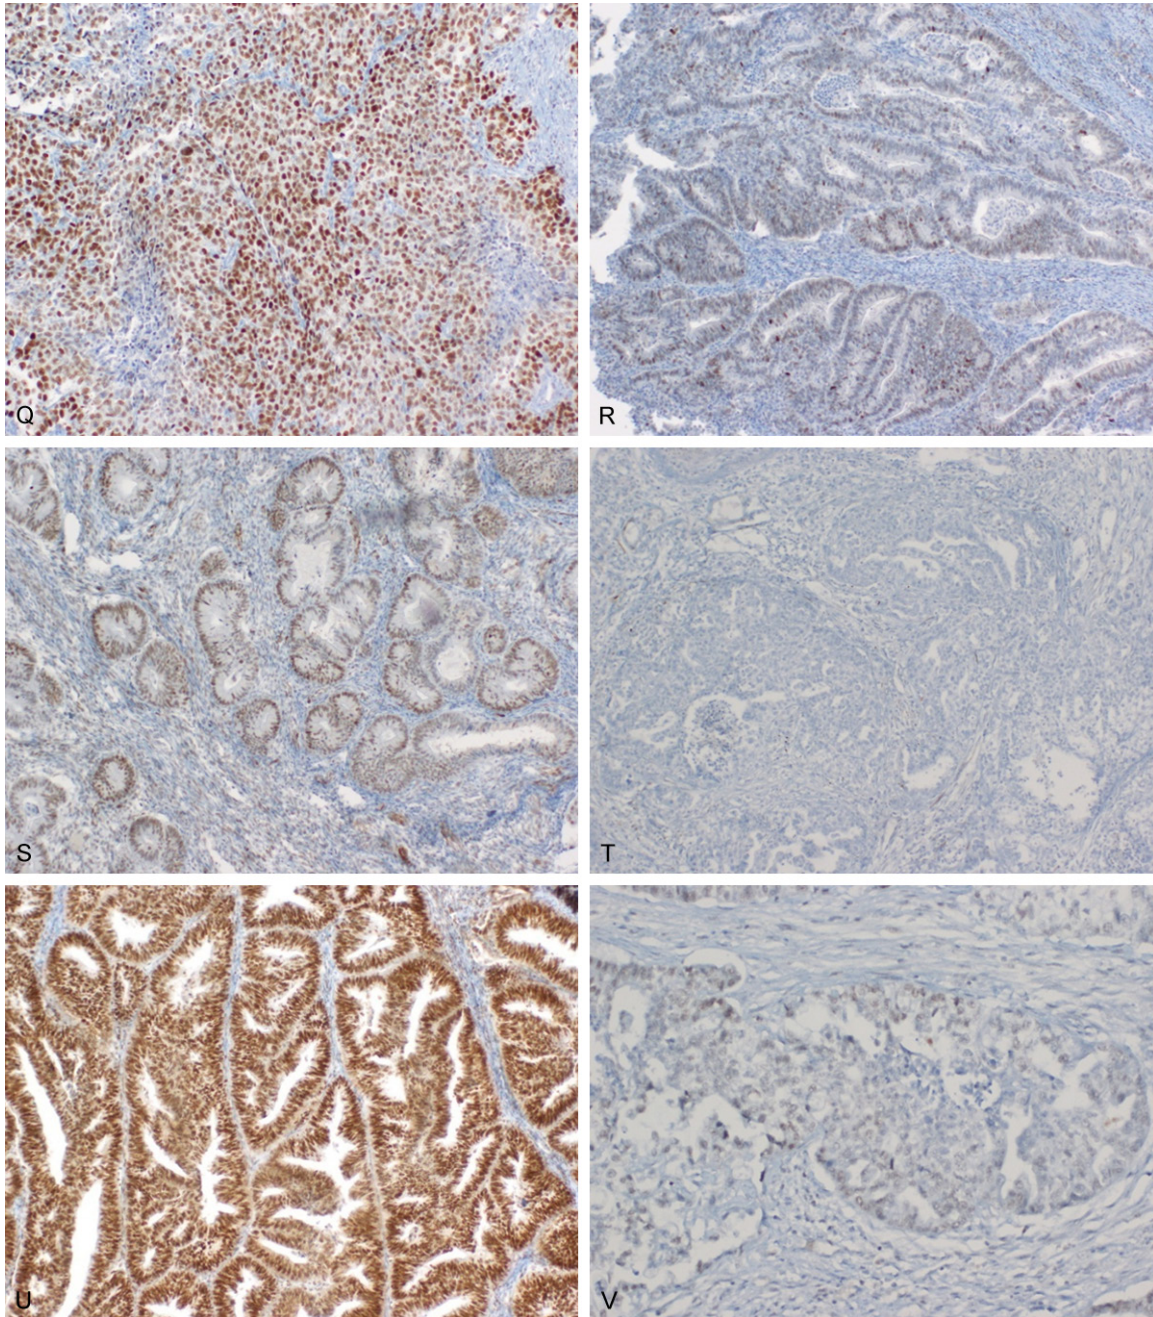

**Figure S1.** Representative immunohistochemistry images of: A. Positive PTEN staining; B. Negative PTEN staining; C. Positive ERBB1 staining; D. Negative ERBB1 staining; E. positive HER2 staining; F. Negative HER2 staining; G. Positive ERBB3 staining; H. Negative ERBB3 staining; I. Positive ERBB4 staining; J. Negative ERBB4 staining; K. Positive PI3K staining; L. Negative PI3K staining; M. Positive pAKT1 staining; N. Negative pAKT1 staining; O. Positive STMN1 staining; P. Negative STMN1 staining; Q. Positive TP53 staining; R. Negative TP53 staining; S. Positive MLH1 staining; T. Negative MLH1 staining; U. Positive MSH2 staining; V. Negative MSH2 staining.
